# Supplementary material for: Polydentate-ligand-supported self-assembly of heterometallic T-shaped Co4RE (RE = Gd, Tb, Y) clusters: synthesis, structure and magnetism
Source: Royal Society of Chemistry journal article supplement (doi:10.1039/c2dt30761h), 2012-01-01
Supplement: c2dt30761h.pdf [file c2dt30761h.pdf]

## Supporting Information

### Polydentate-ligand-supported Self-assembly of Heterometallic T-shaped Co<sub>4</sub>RE (RE = Gd, Tb, Y) Clusters: Synthesis, Structure, and Magnetism

Hongshan Ke,<sup>a,b</sup> Lang Zhao,<sup>a</sup> Yang Guo<sup>a</sup> and Jinkui Tang<sup>a\*</sup>

**Table S1** Selected bond lengths (Å) and angles (°) for compounds **1-3**

| 1           |            | 2           |            | 3           |            |
|-------------|------------|-------------|------------|-------------|------------|
| Co1-O22     | 1.878(3)   | Co1-O22     | 1.891(3)   | Co1-O22     | 1.887(4)   |
| Co1-O24     | 1.915(3)   | Co1-O24     | 1.912(3)   | Co1-O24     | 1.912(4)   |
| Co1-O27     | 1.891(3)   | Co1-O27     | 1.888(3)   | Co1-O27     | 1.891(4)   |
| Co1-O29     | 1.903(3)   | Co1-O29     | 1.921(3)   | Co1-O29     | 1.916(4)   |
| Co1-N5      | 1.886(4)   | Co1-N5      | 1.894(3)   | Co1-N5      | 1.889(5)   |
| Co1-N6      | 1.900(4)   | Co1-N6      | 1.889(3)   | Co1-N6      | 1.897(4)   |
| Co2-O2      | 1.883(3)   | Co2-O2      | 1.893(3)   | Co2-O2      | 1.892(4)   |
| Co2-O4      | 1.916(3)   | Co2-O4      | 1.904(3)   | Co2-O4      | 1.907(4)   |
| Co2-O7      | 1.885(3)   | Co2-O7      | 1.876(3)   | Co2-O7      | 1.880(4)   |
| Co2-O10     | 1.909(3)   | Co2-O10     | 1.918(3)   | Co2-O10     | 1.919(3)   |
| Co2-N3      | 1.894(4)   | Co2-N3      | 1.890(3)   | Co2-N3      | 1.892(4)   |
| Co2-N4      | 1.885(4)   | Co2-N4      | 1.905(3)   | Co2-N4      | 1.902(4)   |
| Co3-O9      | 2.088(3)   | Co3-O9      | 2.095(3)   | Co3-O9      | 2.089(4)   |
| Co3-O14     | 2.110(3)   | Co3-O14     | 2.114(3)   | Co3-O14     | 2.111(4)   |
| Co3-O15     | 2.055(3)   | Co3-O15     | 2.059(3)   | Co3-O15     | 2.051(4)   |
| Co3-O19     | 2.131(3)   | Co3-O19     | 2.137(3)   | Co3-O19     | 2.127(4)   |
| Co3-O20     | 2.054(3)   | Co3-O20     | 2.062(3)   | Co3-O20     | 2.067(4)   |
| Co3-O23     | 2.097(3)   | Co3-O23     | 2.079(3)   | Co3-O23     | 2.082(4)   |
| Co4-O12     | 1.894(3)   | Co4-O12     | 1.899(3)   | Co4-O12     | 1.902(4)   |
| Co4-O15     | 1.882(3)   | Co4-O15     | 1.881(3)   | Co4-O15     | 1.885(4)   |
| Co4-O17     | 1.904(3)   | Co4-O17     | 1.914(3)   | Co4-O17     | 1.906(4)   |
| Co4-O20     | 1.894(3)   | Co4-O20     | 1.896(3)   | Co4-O20     | 1.892(4)   |
| Co4-N1      | 1.904(4)   | Co4-N1      | 1.908(3)   | Co4-N1      | 1.903(4)   |
| Co4-N2      | 1.899(4)   | Co4-N2      | 1.903(3)   | Co4-N2      | 1.898(4)   |
| Gd1-O4      | 2.419(3)   | Tb1-O4      | 2.433(3)   | Y1-O4       | 2.415(4)   |
| Gd1-O5      | 2.467(3)   | Tb1-O5      | 2.455(3)   | Y1-O5       | 2.421(4)   |
| Gd1-O9      | 2.239(3)   | Tb1-O9      | 2.236(3)   | Y1-O9       | 2.206(4)   |
| Gd1-O10     | 2.470(3)   | Tb1-O10     | 2.416(3)   | Y1-O10      | 2.388(4)   |
| Gd1-O23     | 2.247(3)   | Tb1-O23     | 2.232(3)   | Y1-O23      | 2.207(4)   |
| Gd1-O24     | 2.437(3)   | Tb1-O24     | 2.462(3)   | Y1-O24      | 2.435(4)   |
| Gd1-O29     | 2.438(3)   | Tb1-O29     | 2.402(3)   | Y1-O29      | 2.380(3)   |
| Gd1-O30     | 2.454(3)   | Tb1-O30     | 2.477(3)   | Y1-O30      | 2.455(4)   |
| Co1-O24-Gd1 | 105.71(13) | Co1-O24-Tb1 | 103.84(11) | Co1-O24-Y1  | 103.89(15) |
| Co1-O29-Gd1 | 106.07(13) | Co1-O29-Tb1 | 105.76(11) | Co1-O29-Y1  | 105.81(15) |
| Co2-O4-Gd1  | 105.49(13) | Co2-O4-Tb1  | 105.80(12) | Co2-O4-Y1   | 105.49(16) |
| Co2-O10-Gd1 | 103.83(13) | Co2-O10-Tb1 | 106.02(12) | Co2-O10-Y1  | 106.09(16) |
| Co3-O9-Gd1  | 99.53(13)  | Co3-O9-Tb1  | 99.32(11)  | Co3-O9-Y1   | 99.73(15)  |
| Co3-O23-Gd1 | 98.99(13)  | Co3-O23-Tb1 | 99.90(11)  | Co3-O23-Y1  | 99.91(15)  |
| Co3-O15-Co4 | 97.04(14)  | Co3-O15-Co4 | 97.11(12)  | Co3-O15-Co4 | 97.21(16)  |
| Co3-O20-Co4 | 96.71(14)  | Co3-O20-Co4 | 96.58(12)  | Co3-O20-Co4 | 96.49(16)  |
| Co1 ... Gd1 | 3.4833(7)  | Co1 ... Tb1 | 3.4595(6)  | Co1 ... Y1  | 3.4381(9)  |
| Co2 ... Gd1 | 3.4641(6)  | Co2 ... Tb1 | 3.4744(6)  | Co2 ... Y1  | 3.4533(9)  |
| Co3 ... Gd1 | 3.3048(7)  | Co3 ... Tb1 | 3.3017(6)  | Co3 ... Y1  | 3.2846(9)  |
| Co3 ... Co4 | 2.9520(9)  | Co3 ... Co4 | 2.9562(8)  | Co3 ... Co4 | 2.9553(10) |

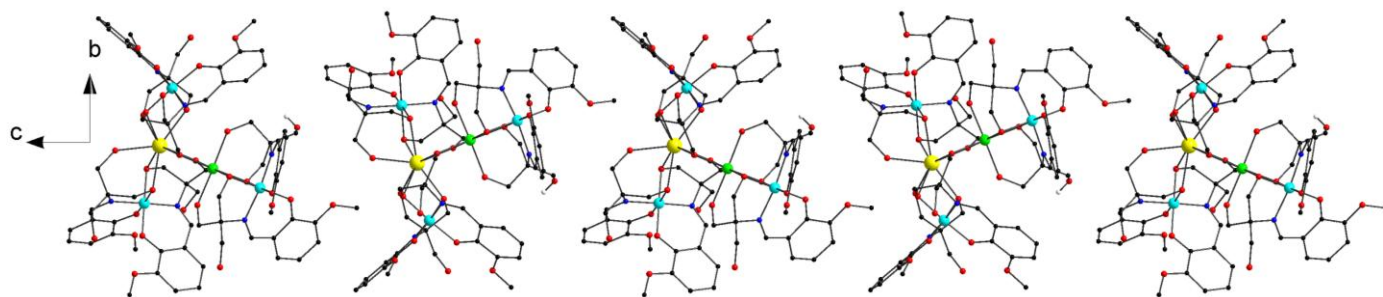

Fig. S1 The crystal packing of 2 showing the 1-D chain along a-axis.

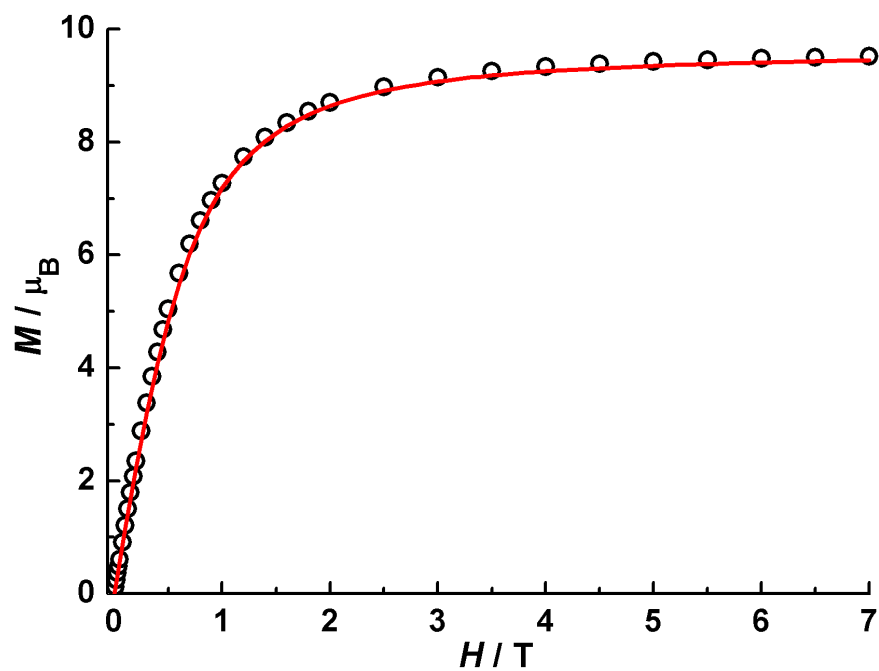

Fig. S2  $M$  vs  $H$  plot of 1 collected at 2 K. Data were simulated using MAGPACK (solid line), see the main text for parameters.

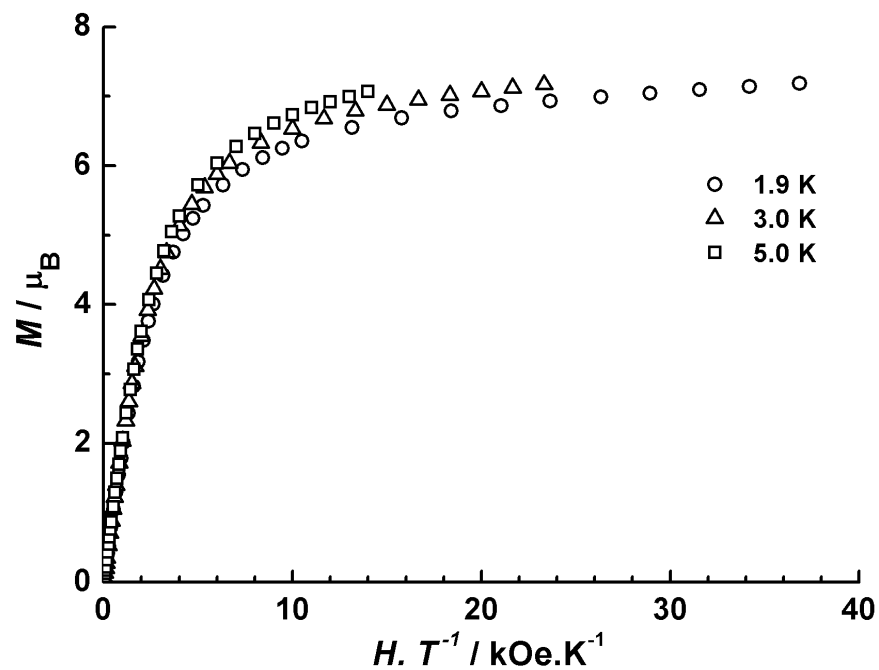

Fig. S3 Plot of  $M$  versus  $H/T$  for 2 at different temperatures below 5 K.

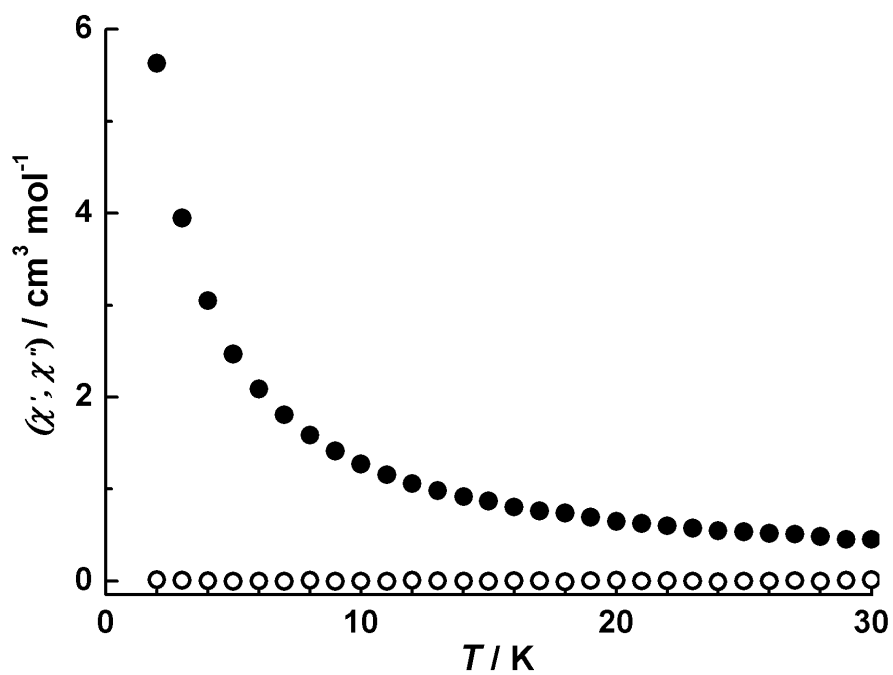

**Fig. S4** Temperature dependences of in-phase ( $\chi'$ ) (top) and out-of-phase ( $\chi''$ ) (bottom) ac susceptibilities of **2** at 997 Hz in 600 Oe applied dc field and 3 Oe ac field.
